# Supplementary material for: Polycomb group gene BMI1 controls invasion of medulloblastoma cells and inhibits BMP-regulated cell adhesion
Source: PubMed Central journal article supplement (PMC3928978; doi:10.1186/2051-5960-2-10), 2014-01-24
Supplement: 2051-5960-2-10-S2.pdf [file 2051-5960-2-10-S2.pdf]

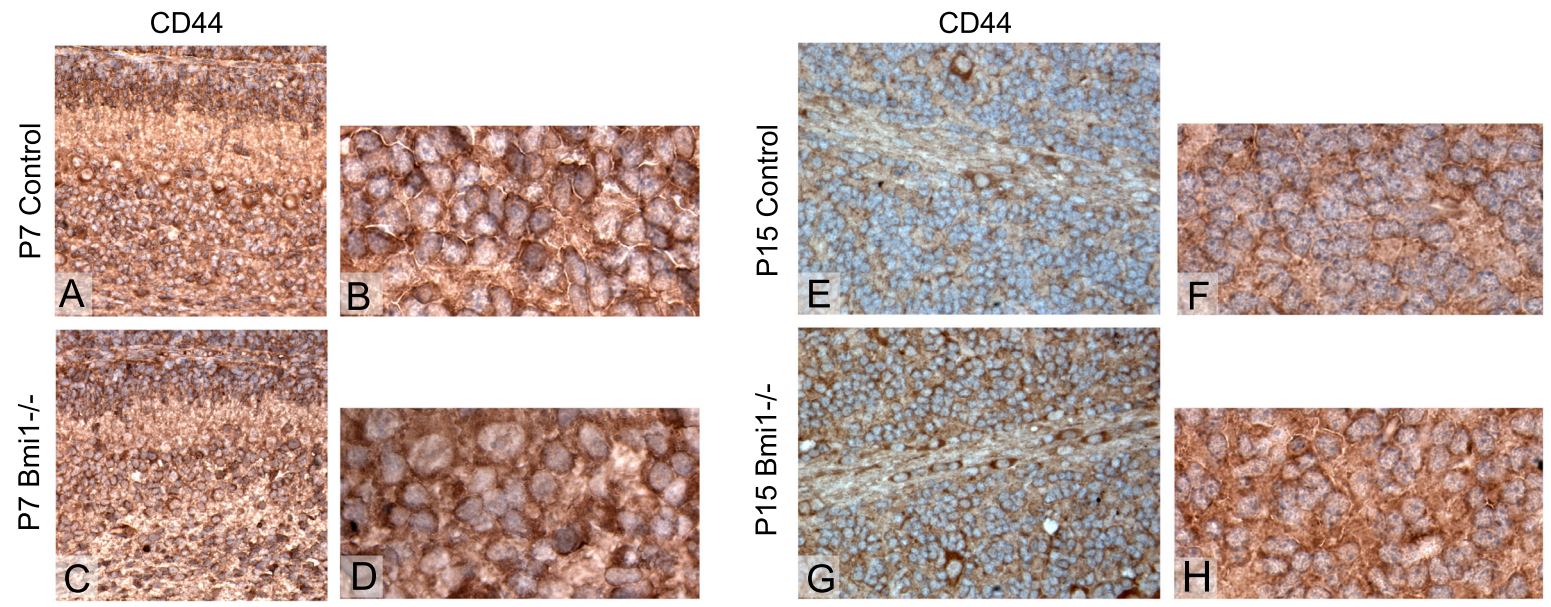

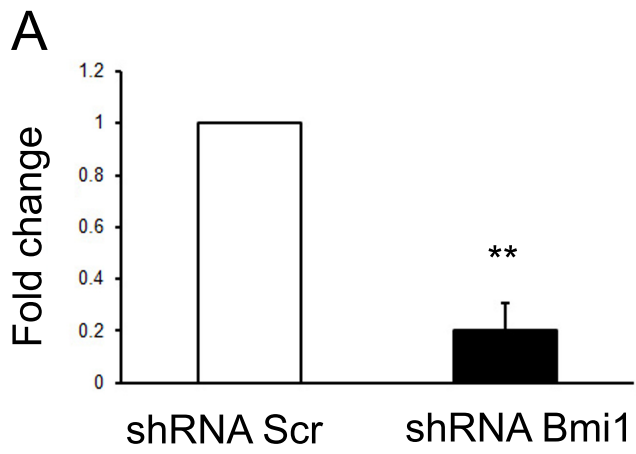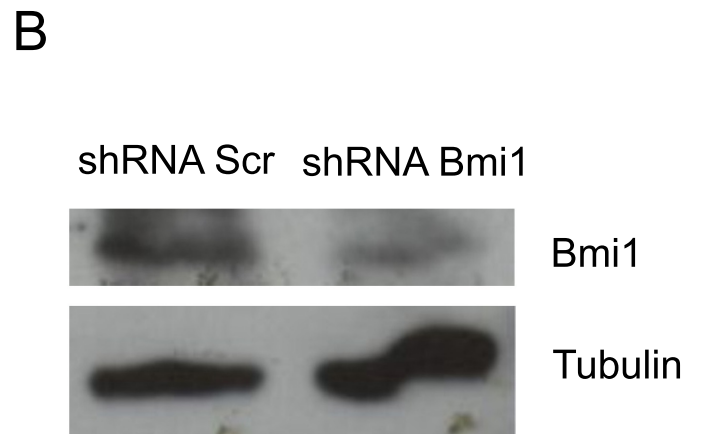

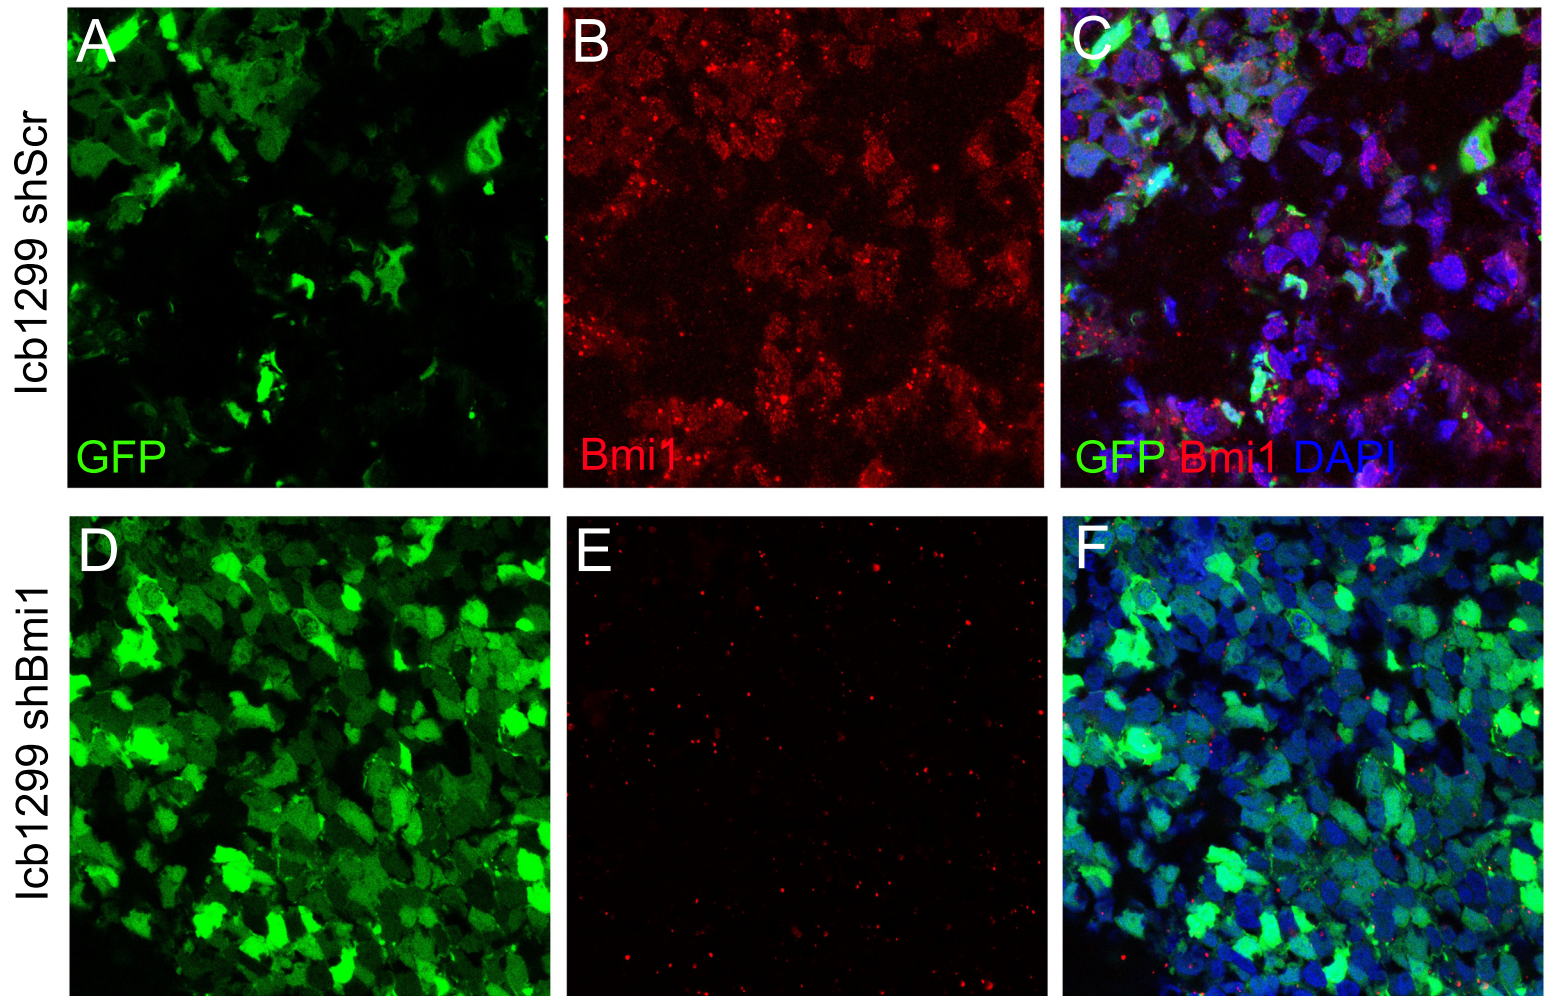

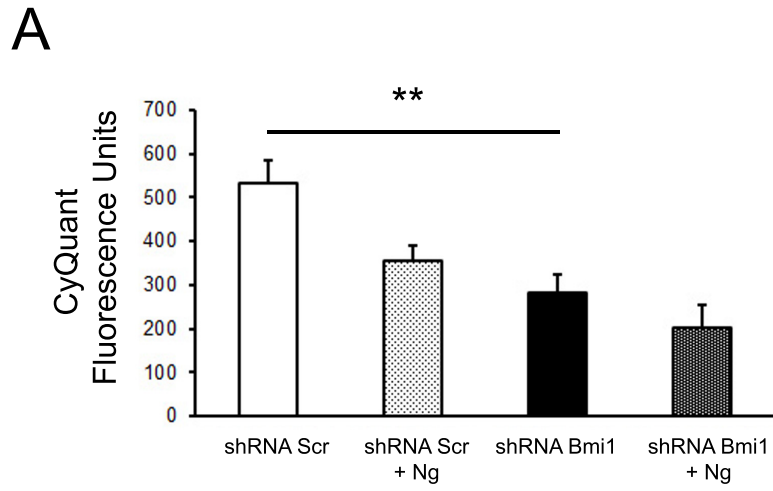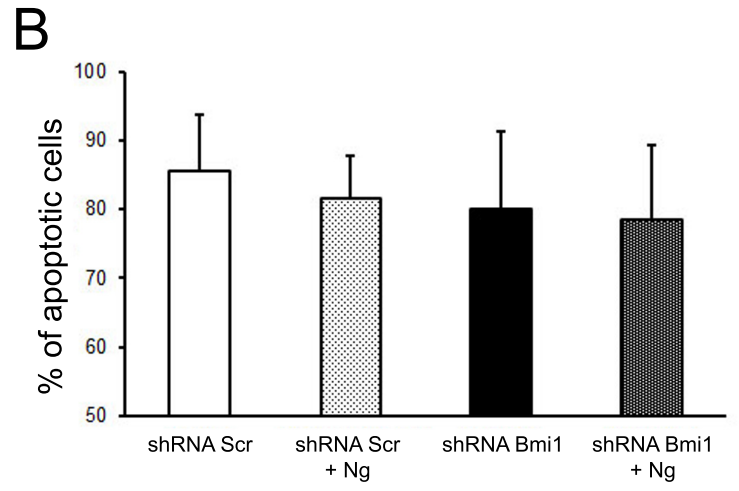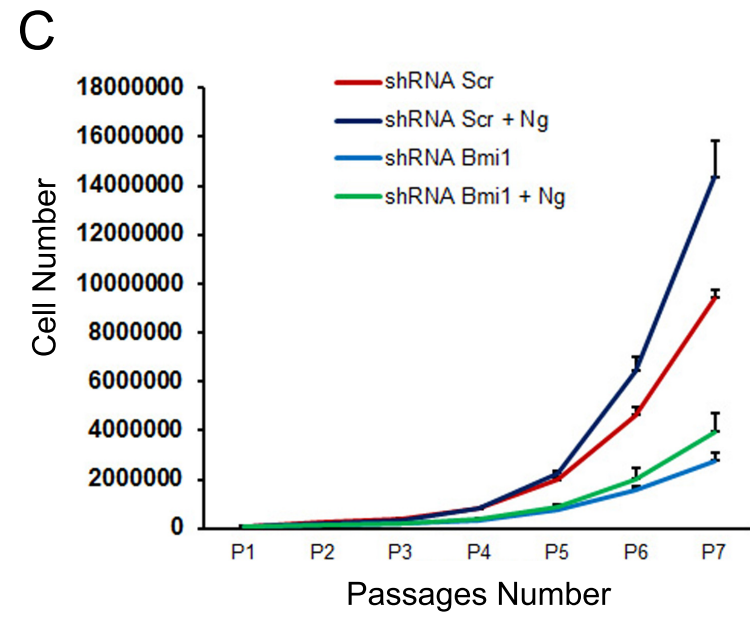

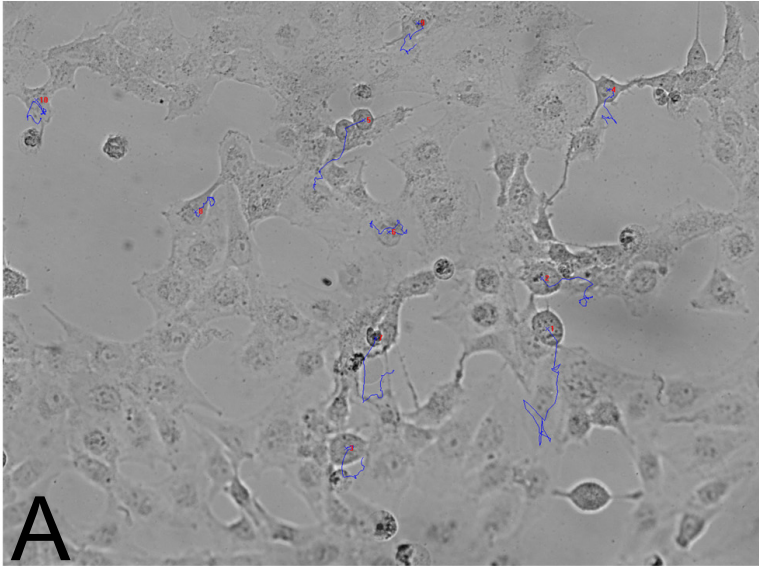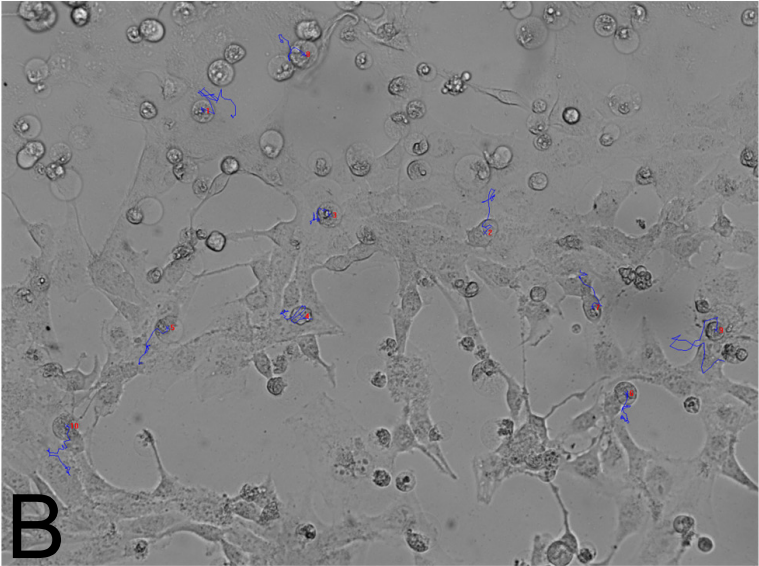

A

B

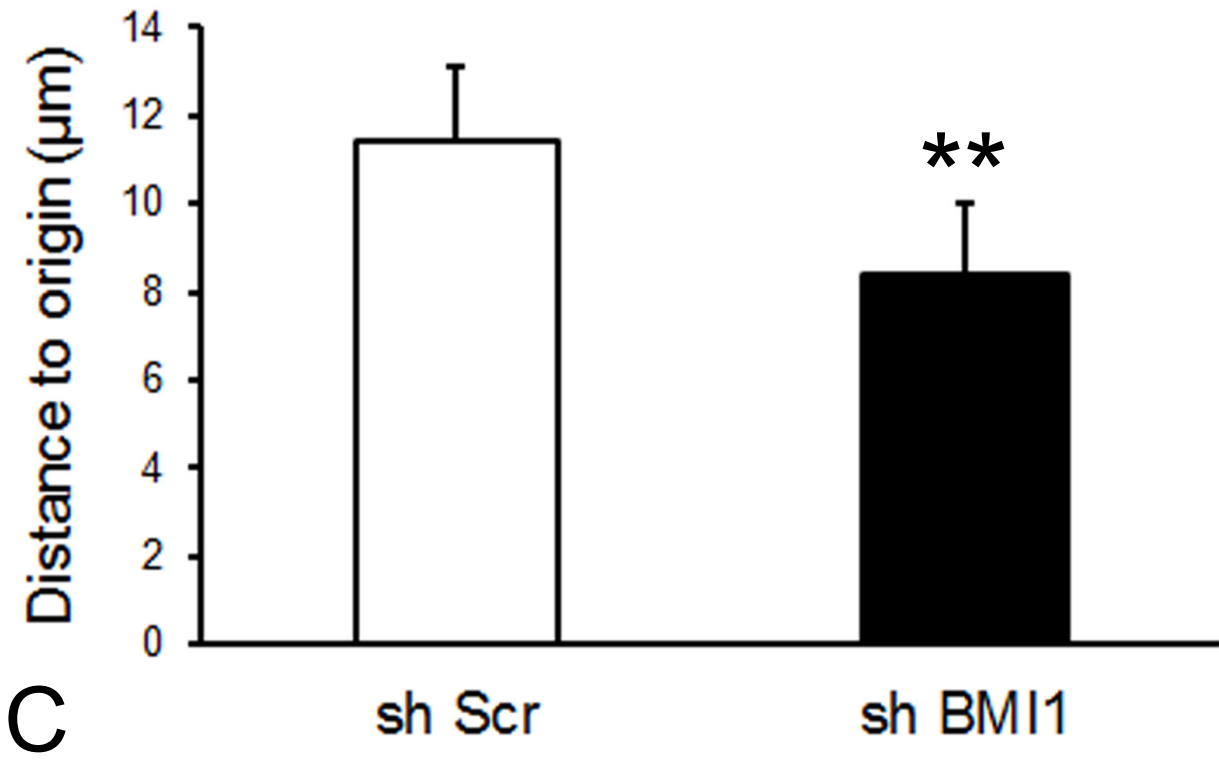

C
